# Supplementary material for: Study on Physicochemical Properties of Biocomposite Films with Spent Coffee Grounds as a Filler and Their Influence on Physiological State of Growing Plants
Source: MDPI journal article supplement (doi:10.3390/ijms24097864), 2023-04-26
Supplement: s1 [file s1]

## Study on Physicochemical Properties of Biocomposite Films with Spent Coffee Grounds as a Filler and their Influence on Physiological State of Growing Plants

Magdalena Zdanowicz <sup>1,\*</sup>, Marta Rokosa <sup>2</sup>, Magdalena Pieczykolan <sup>1</sup>, Adrian Krzysztof Antosik <sup>1,3</sup>, Justyna Chudecka <sup>4</sup> and Małgorzata Mikiciuk <sup>2</sup>

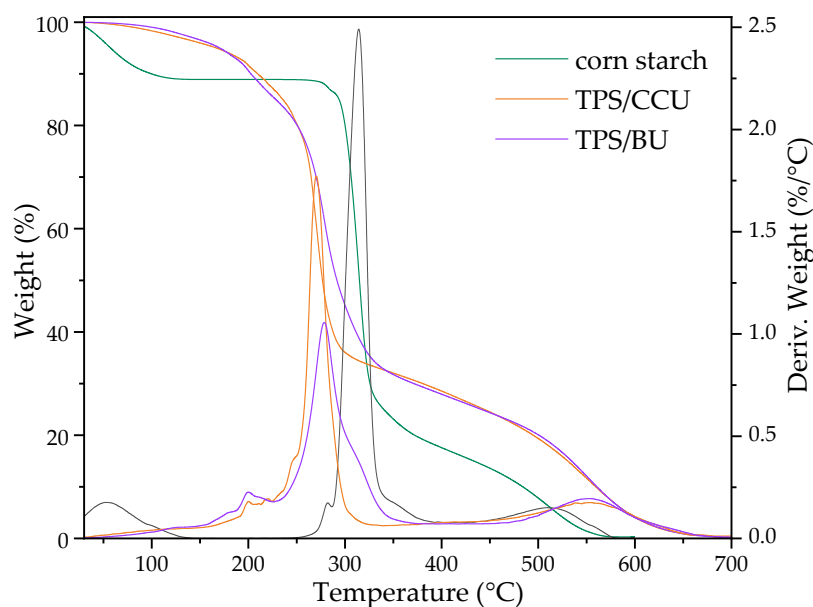

**Figure S1.** Thermal results (TGA and DTG curves) for native corn starch and TPS/DES.

**Table S1.** Temperature of drop of the weight loss – initial temperature of a decomposition ( $T_{deg0}$ ) and temperature for maximum peak on DTG.

| Sample     | $T_{deg0}$ (° C) | DTG $_{max\ peak}$ (° C) |
|------------|------------------|--------------------------|
| Starch     | 292              | 314                      |
| TPS/CCU    | 239              | 272                      |
| TPS/CCU/cf | 251              | 272                      |
| TPS/CCU+cf | 244              | 274                      |
| TPS/BU     | 247              | 278                      |
| TPS/BU/cf  | 245              | 275                      |
| TPS/BU+cf  | 243              | 280                      |
